# Supplementary material
Source: PubMed Central journal article supplement (PMC5061921)
Supplement: hdy201654x1.pdf [file hdy201654x1.pdf]

**Supplementary Figure 1. A plot of the spacing between SNPs before and after each filtering step.**

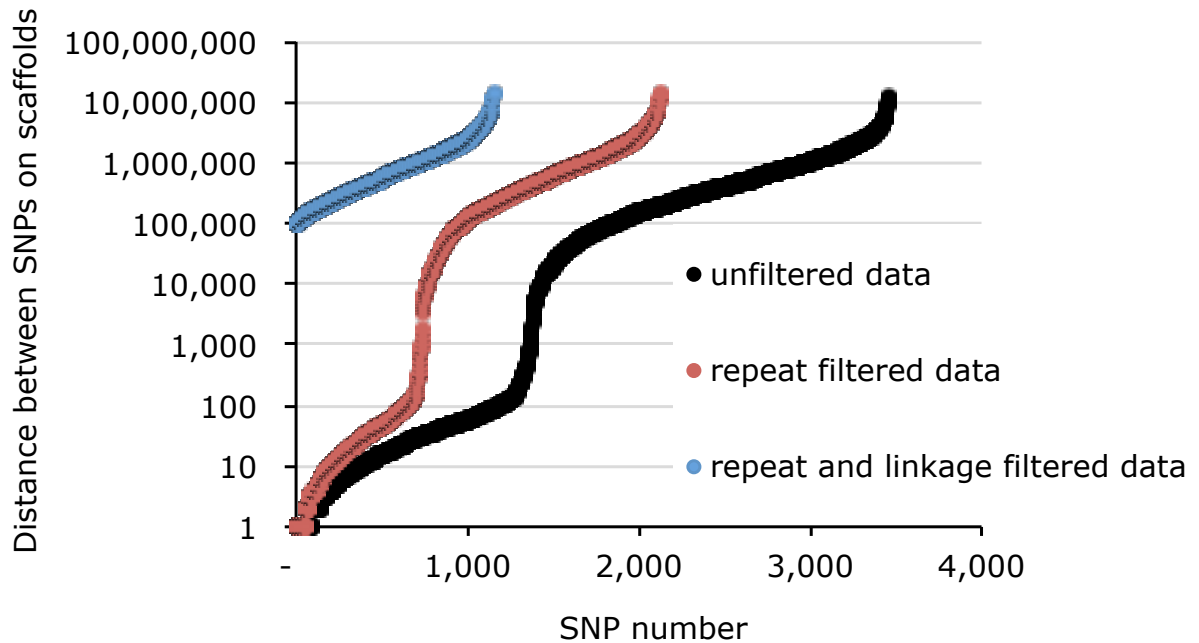

The  $x$ -axis is the cumulative number of SNPs, ordered based on their spacing with the next nearest SNP in the dataset. The  $y$ -axis is the distance in base pairs (bp) to the next nearest SNP on the same scaffold. The black markers represent the unfiltered data, constituting the 3,678 SNPs in the VCF file generated by Moura *et al.* (2014a), accessed from the Dryad data depository (doi: 10.5061/dryad.qk22t). The red markers represent the same data after SNPs that fall into regions of known repetitive elements, excessive or low coverage, or low mappability, or putatively selected loci have been filtered out. The blue line represents the data after further filtering to randomly remove one SNP from pairs of SNPs that are <100,000 bp apart on the same scaffold, resulting in a dataset of 1,346 putatively unlinked, neutrally evolving SNPs.

## Supplementary Figure 2. $f_4$ -ratio estimation of admixture proportions.

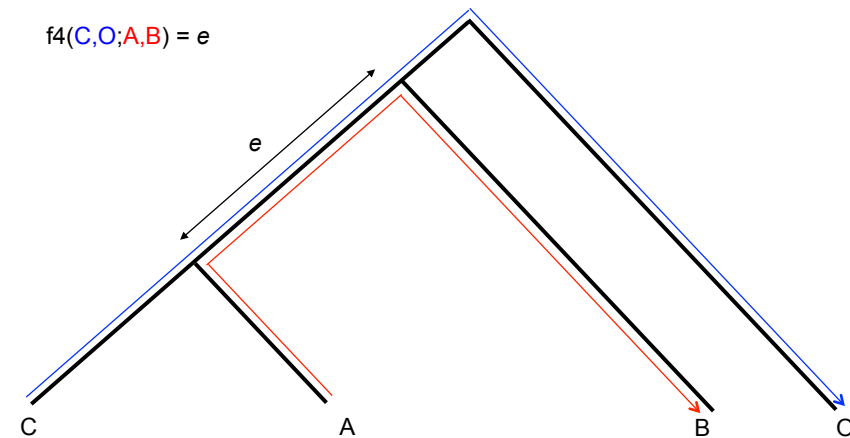

When we estimate the  $f_4$ -statistic for an incorrect topology, in this case  $f_4(C,O; A,B)$ , the drift paths from C to O and from A to B overlap along edge  $e$ , resulting in a significant  $f_4$ -statistic:

$$f_4(C,O; A,B) = e$$

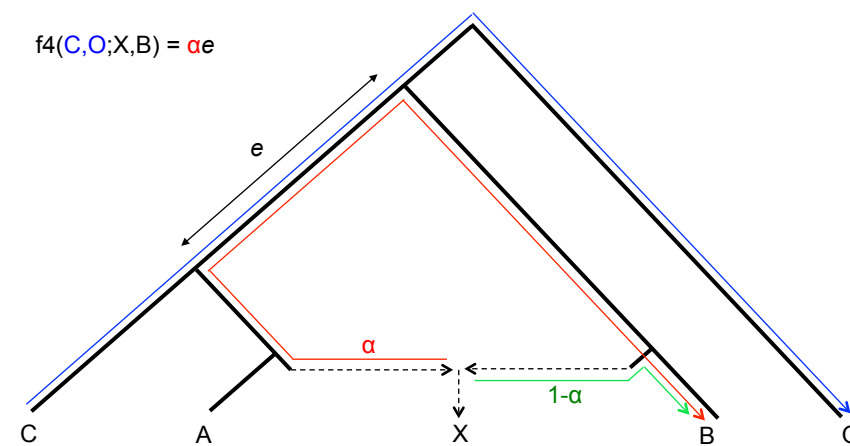

If we introduce admixture into this scenario, then drift can take different paths between populations. In this case, population X results from admixture between populations closely related to A and B (let us call them  $A'$  and  $B'$ ). If we consider  $f_4(C,O;X,B)$ , then the drift path X to B can take a similar path to before, along edge  $e$ , but only with probability  $\alpha$ , as it can also take a second path to B with probability  $1-\alpha$ . Therefore  $f_4(C,O;X,B) = \alpha e$

We can thus estimate the admixture proportions of X, in terms of the relative contributions of  $A'$  and  $B'$ , using the  $f_4$  ratio estimator of Patterson *et al.* (2012).

$$f_4(C,O;X,B)/f_4(C,O;A,B) = \alpha$$

However, an important consideration that is often overlooked, is that if the admixture event predated the split time of A and C, then  $\alpha$  can be underestimated, see <http://www.mailund.dk/index.php/2014/12/17/estimating-admixture-proportions/comment-page-1/>

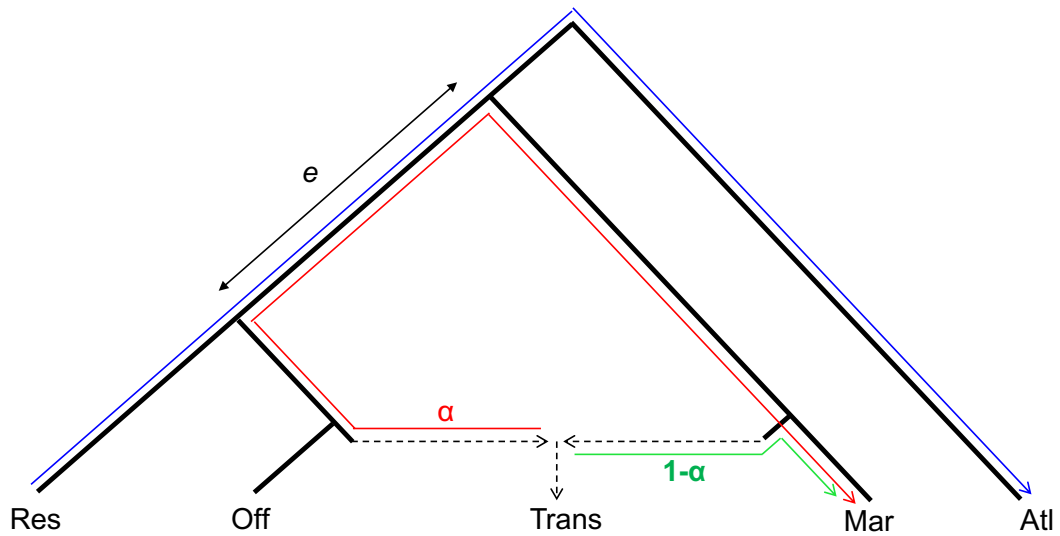

$$f_4(\text{Res,Atl;Trans,Mar})/f_4(\text{Res,Atl;Off,Mar}) = \alpha$$

$$0.0040 / 0.0089 = \alpha = 0.449$$

So for example, our estimate that the *transient* ecotype shares approximately 45% (based on the above estimate of  $\alpha$ ) ancestry with the *offshore* ecotype compared with 55% with the Marion Island population depends upon the admixture occurring after the *resident* and *offshore* ecotype split.

**Supplementary Figure 3. Nuclear SNP phylogeny of subsamples 1-4 of different individuals as listed in Table S1.**

**(a)**

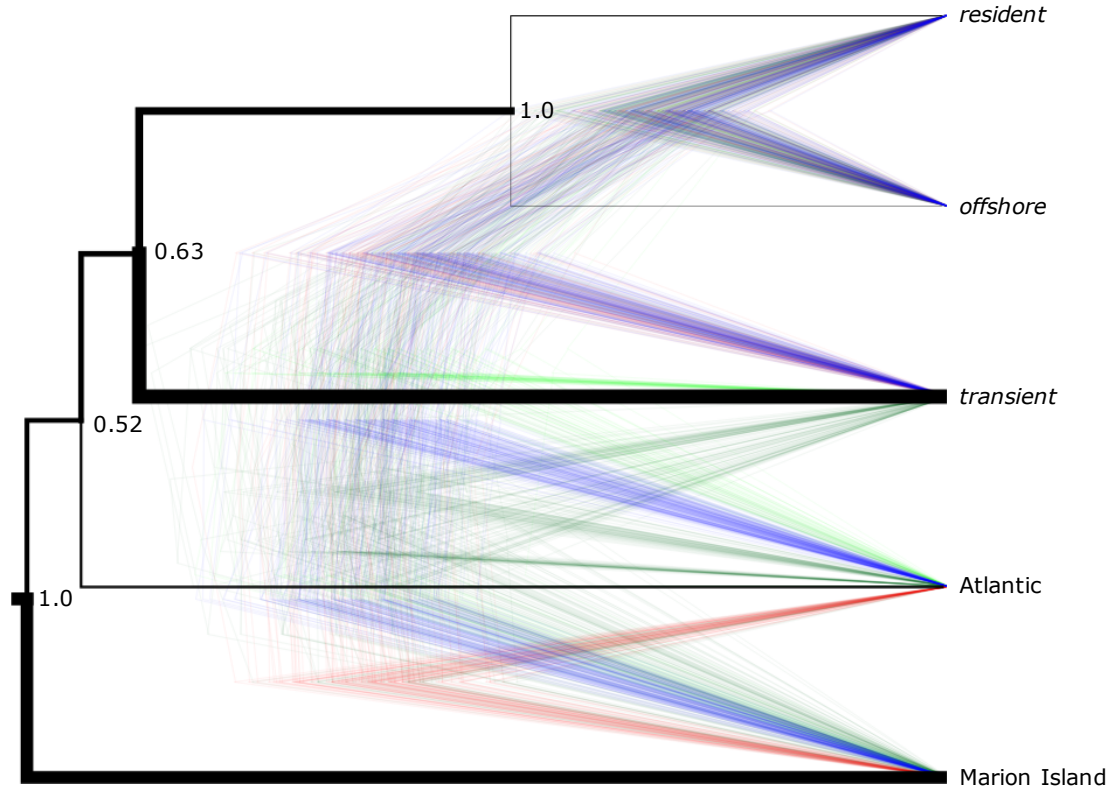

**(b)**

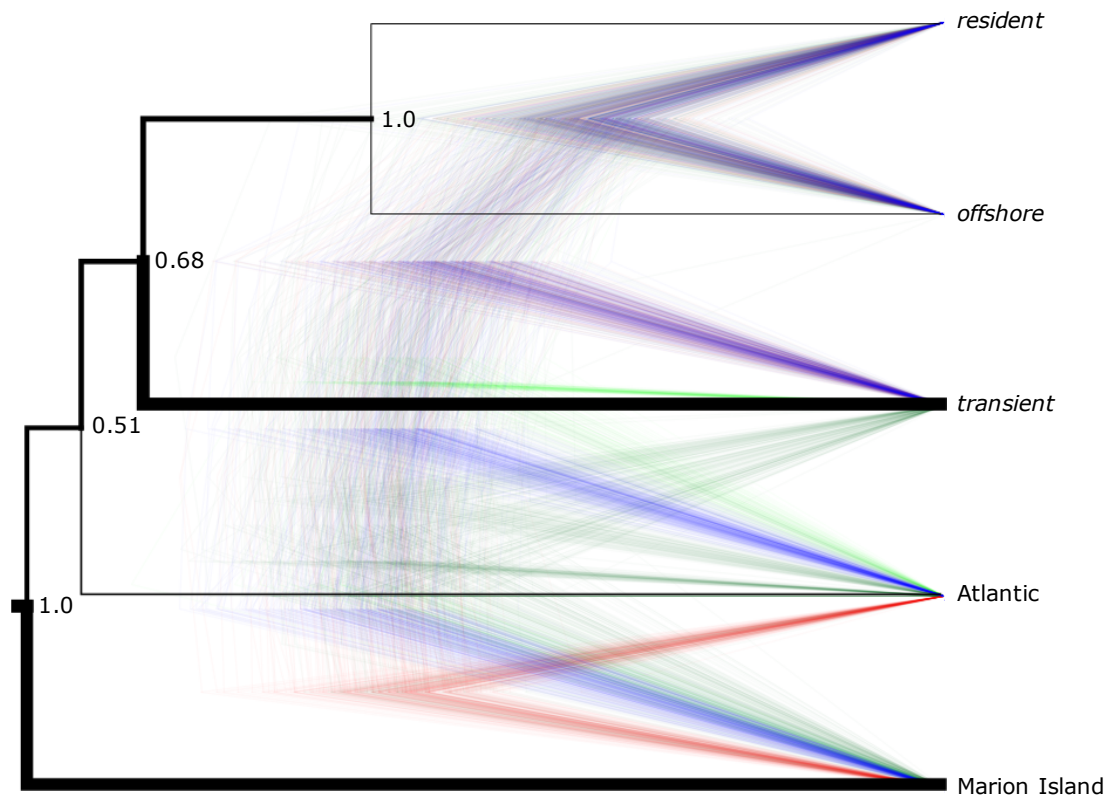

(c)

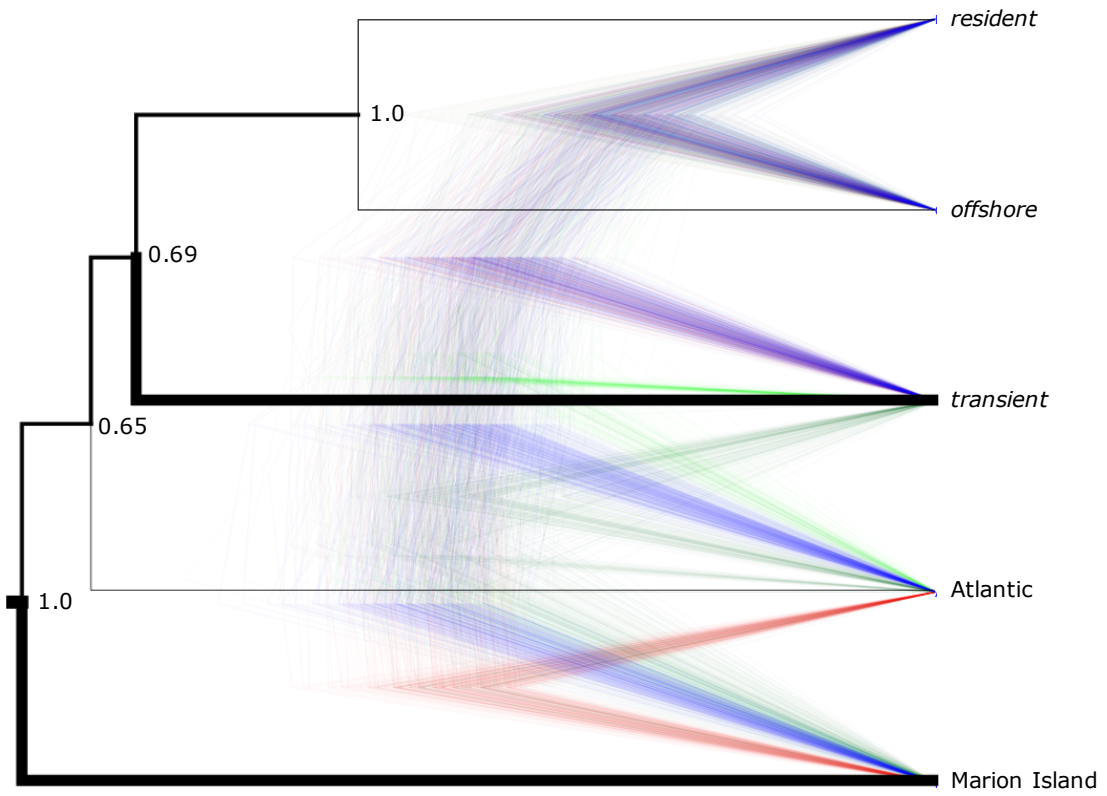

(d)

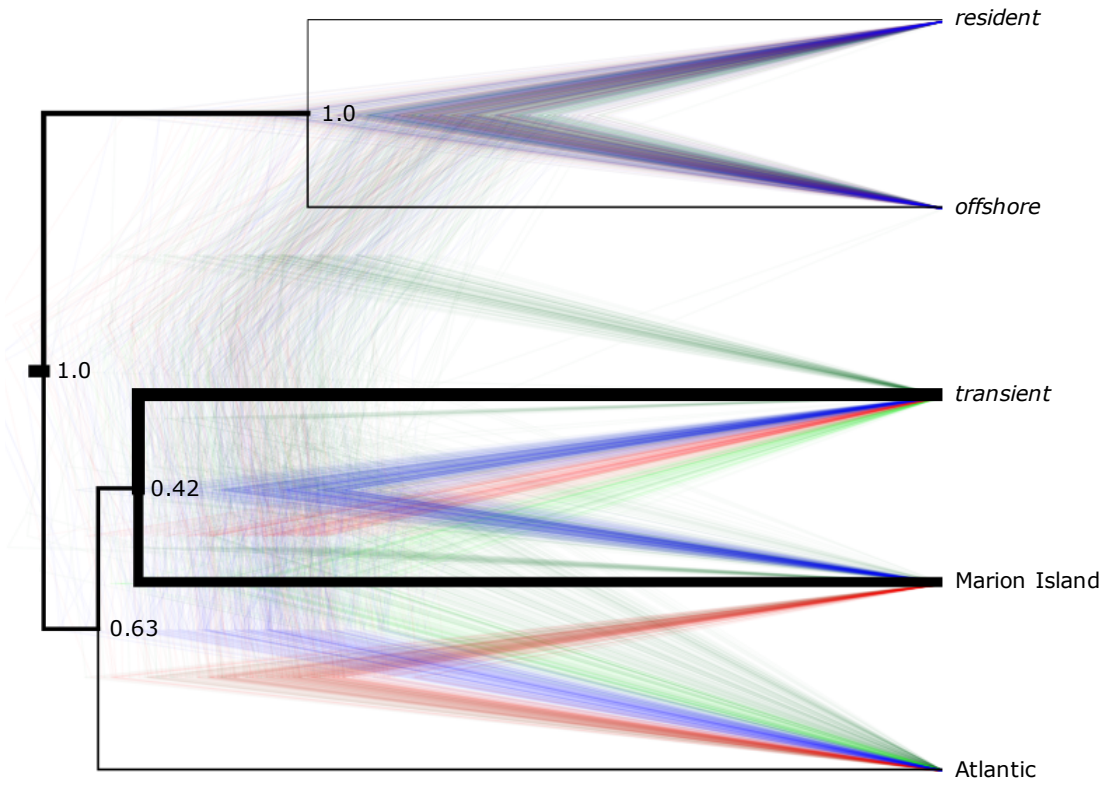

**Supplementary Figure 4. A comparison of the expected (the visualised drift paths) and observed value of the  $f_4$ -statistics.**

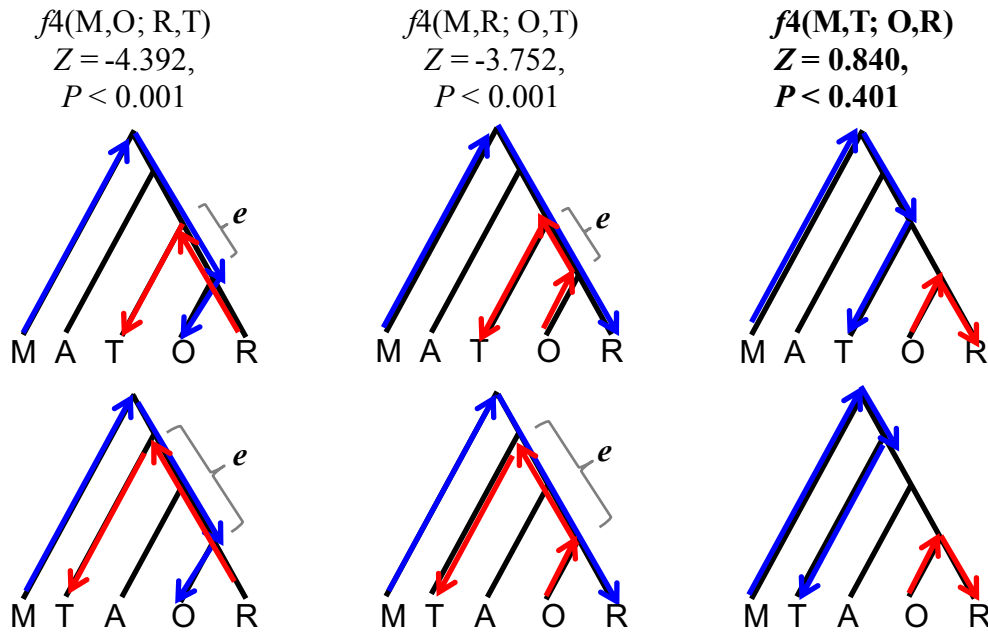

(a) A comparison of the expected (the visualised drift paths) and observed value of the  $f_4$ -statistics for the three possible tree-like relationships among the following four populations: Marion Island (M), North Pacific *Transient* (T), North Pacific *Resident* (R) and North Pacific *Offshore* (O) and assuming the topology reconstructed from allele frequencies of SNPs generated by SNAPP (top row) and the topology inferred from concatenated RAD sequences by Moura *et al.*, (2015) (bottom row). In this example the observed and expected  $f_4$ -statistic of the form  $f_4(A,B; C,D)$  are in agreement, as there is no significant observed covariance in drift between (M,T) and (O,R) as expected and the tree (M,T; O,R) appears to describe the relationship among these populations, but the trees (M,O; R,T) and (M,R; O,T) are rejected as the drift paths overlap along edge  $e$ , and the observed  $f_4$ -statistic is significantly different from zero. However, we note that although drift paths overlap along the same edge  $e$  for trees (M,O; R,T) and (M,R; O,T), we observe some difference in the  $f_4$ - and Z-statistics, suggesting that some drift is taking another path in (M,R; O,T). The  $f_4$ -statistic estimated higher rates of drift along edges estimated by SNAPP as having low theta, as would be expected in populations with lower effective population size (theta is scaled by effective population size). Note that statistical tests within each combination of taxa, and across different combinations of taxa are not independent of each other but should be viewed as the strength of support for deviations from a tree-like model of population branching across various four-taxon subsets.

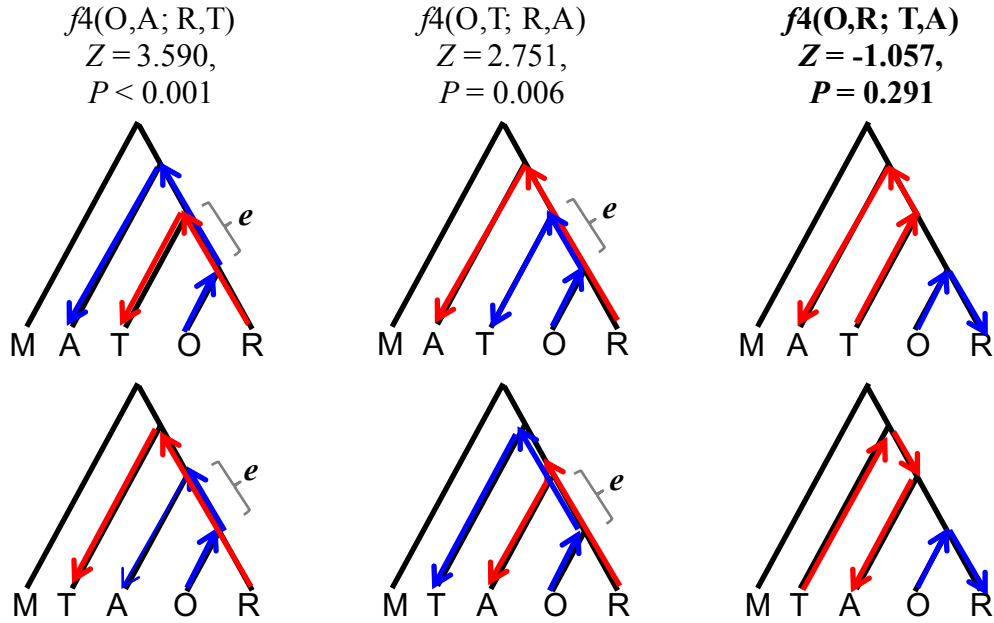

(b) As in figure 4a, here we present a comparison of the expected and observed value of the  $f_4$ -statistics for the three possible tree-like relationships in this example among the populations: Atlantic (A), North Pacific *Transient* (T), North Pacific *Resident* (R) and North Pacific *Offshore* (O). Again, the observed and expected  $f_4$ -statistics are in agreement. The tree (O,R; T,A) appears to describe the relationship among these populations, but the trees (O,A; R,T) and (O,T; R,A) are rejected. In contrast to the previous example, here the drift paths are in the same direction along edge  $e$ , hence the positive  $f_4$ -statistic and Z-score.

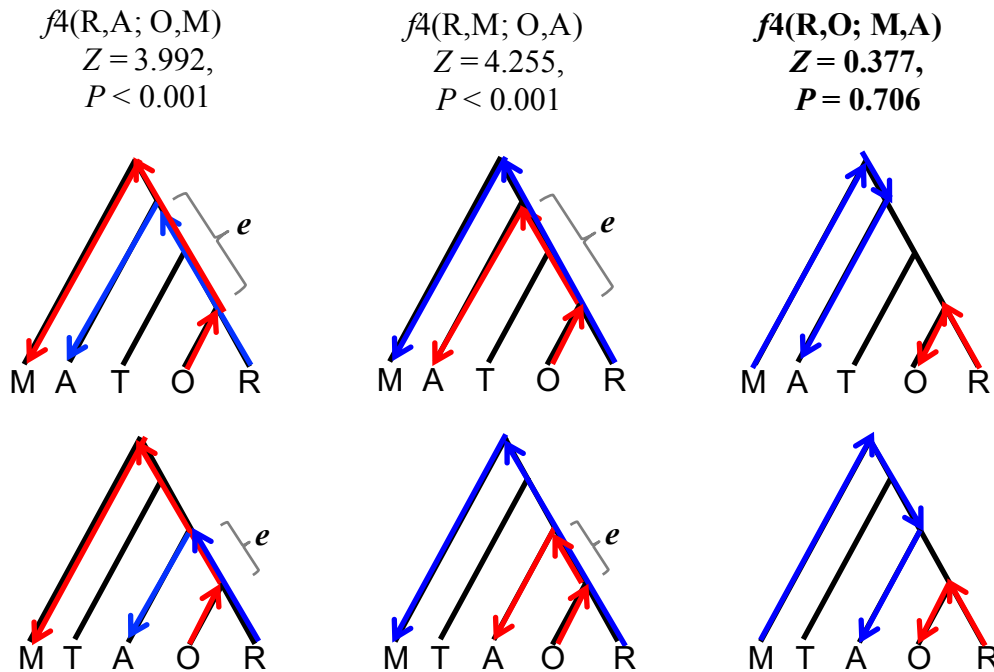

(c) A comparison of the expected and observed value of the  $f_4$ -statistics for the three possible tree-like relationships among the two outgroups Atlantic (A) and Marion Island (M), and the North Pacific *Resident* (R) and *Offshore* (O) ecotypes. Again, the observed and expected  $f_4$ -statistics are in agreement. The tree (R,O; M,A) appears to describe the relationship among these populations.

$$f_4(M,T; R,A)$$

$$Z = -2.785,$$

$$P = 0.005$$

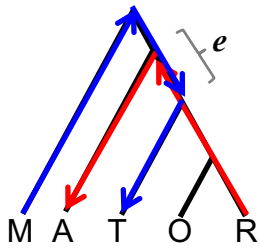

$$f_4(M,R; T,A)$$

$$Z = -2.028,$$

$$P = 0.043$$

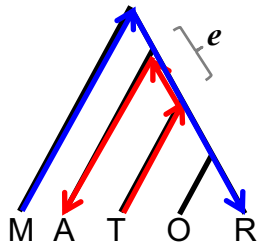

$$f_4(M,A; R,T)$$

$$Z = -0.414,$$

$$P = 0.679$$

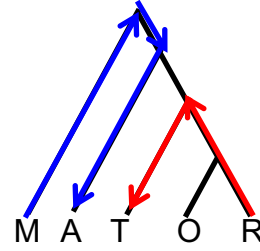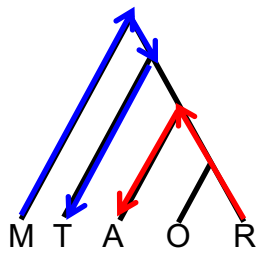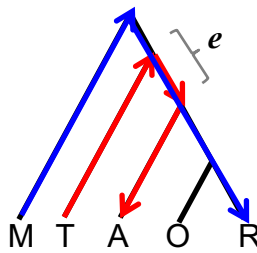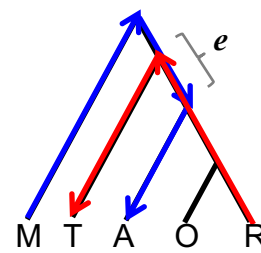

(d) (M,A; R,T) appears to describe the relationship among these populations. The expected and observed  $f_4$ -statistics agree when the topology inferred using SNAPP is assumed, but not when the topology from Moura et al.'s concatenated RAD-seq data is assumed.

$$f_4(M,T; O,A)$$

$$Z = -2.227,$$

$$P = 0.026$$

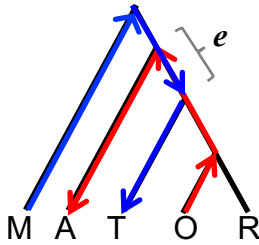

$$f_4(M,O; T,A)$$

$$Z = -1.216,$$

$$P = 0.224$$

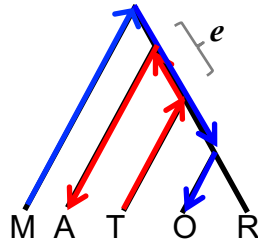

$$f_4(M,A; O,T)$$

$$Z = -0.851,$$

$$P = 0.395$$

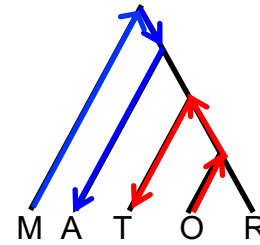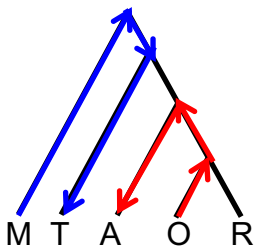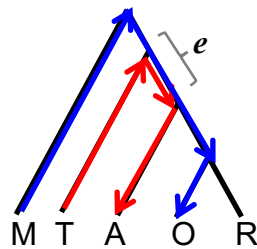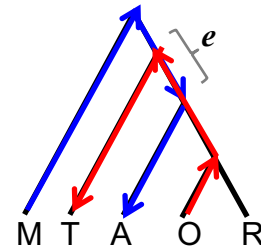

(e) In this example we find no clear support from the observed data for any one of the three possible trees that could describe the relationships among the four populations (M, T, A and R) above the other two trees. The observed and expected  $f_4$ -statistic are discordant and the relationship among these four populations does not appear to be fully described by a simple tree model.



**Supplementary Figure 5. TreeMix inference of admixture events.**

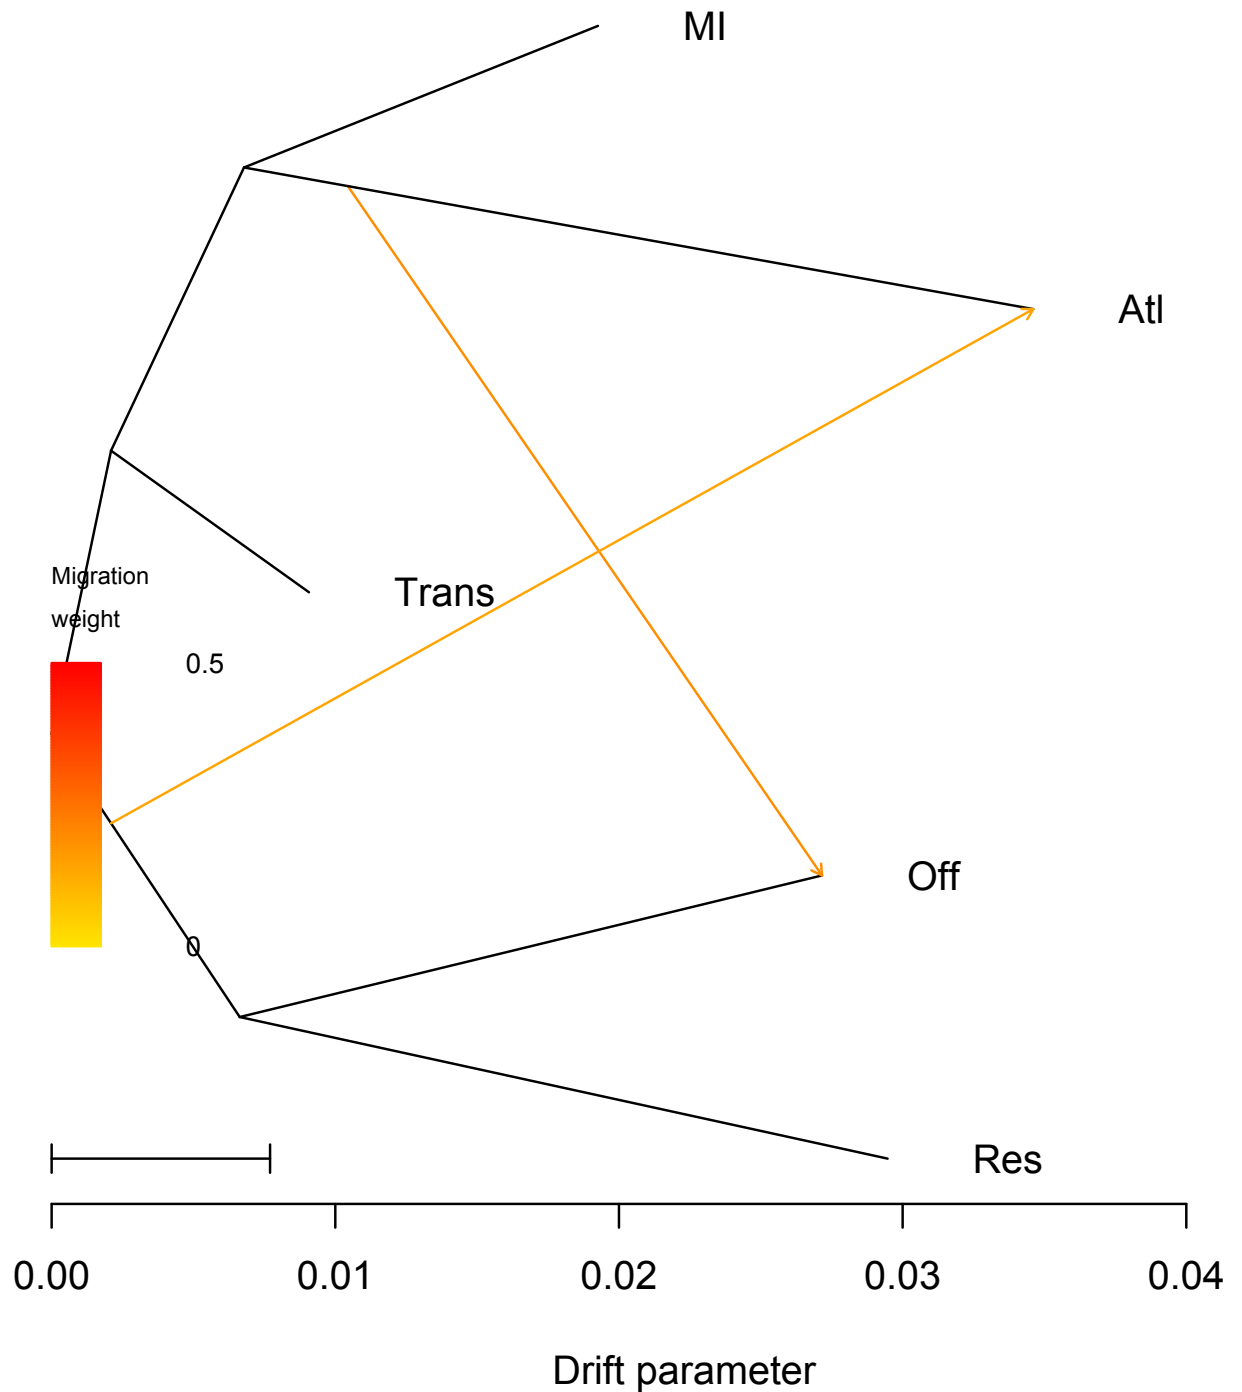

**(a)** TreeMix admixture graph visualising the relationship among populations as a bifurcating maximum-likelihood tree, with migration edges between populations that are a poor fit for this tree model. The strength and directionality of the inferred introgression is indicated by the coloured arrows. The scale bar represents 10 times the average standard error (s.e.) of the values in the covariance matrix.

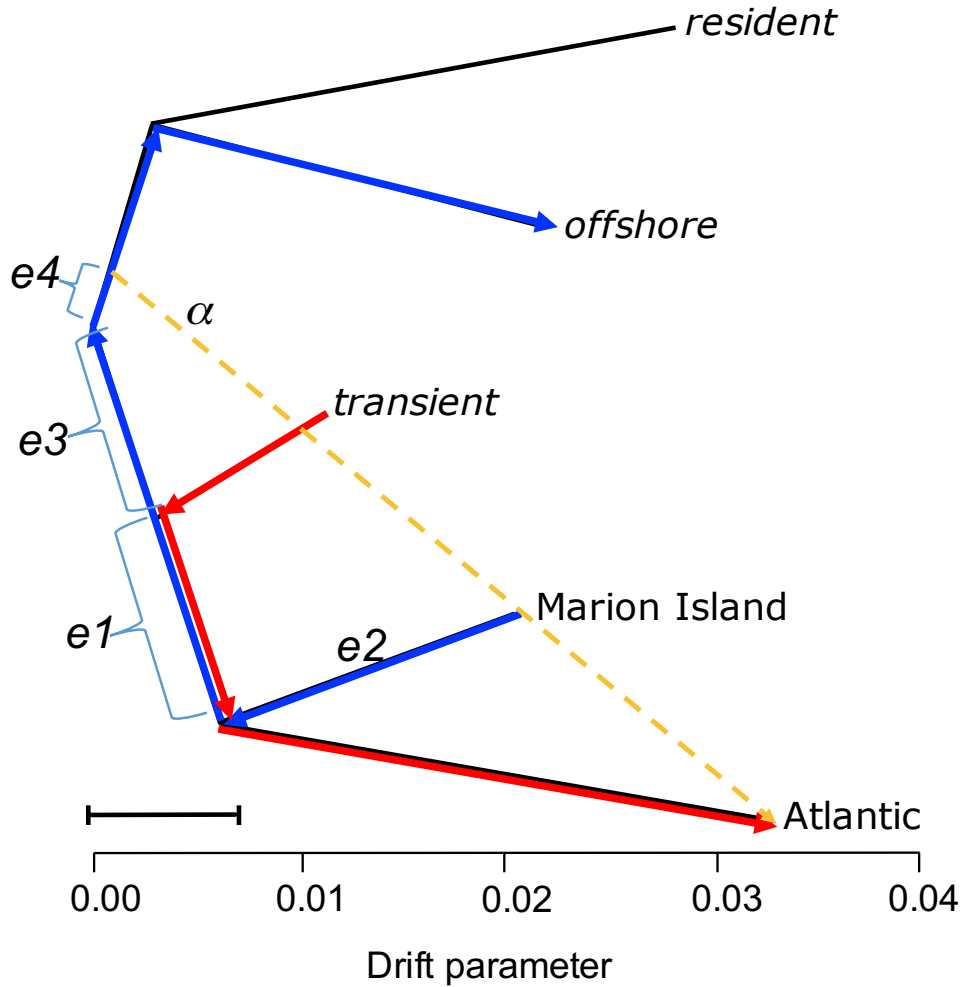

**(b)** The migration edges inferred by TreeMix and visualised above in Supplementary Figure 5a, are added to the tree from Figure 3a for simplicity, and the drift paths from the  $f_4$  statistic test  $f_4(M,O; T,A)$  are coloured in blue and red. Although the  $f_4$  statistic is expected to be significant and negative due to drift taking overlapping paths in the opposite directions along edge  $e1$ , we see that the migration events reduce the extent of this covariance in allele frequency changes.

For example, if we consider the blue drift path from Marion Island to *offshore*, we see that at least some of the overlapping drift that occurs along path  $e1$  in the opposing direction to the red drift path from *transient* to Atlantic will be cancelled out, as the drift from Marion Island to *offshore* along edges  $e1$ - $e4$  will be shared via the migration edge with the Atlantic population with probability  $\alpha$ , where  $\alpha$  depends upon the weight of migration.

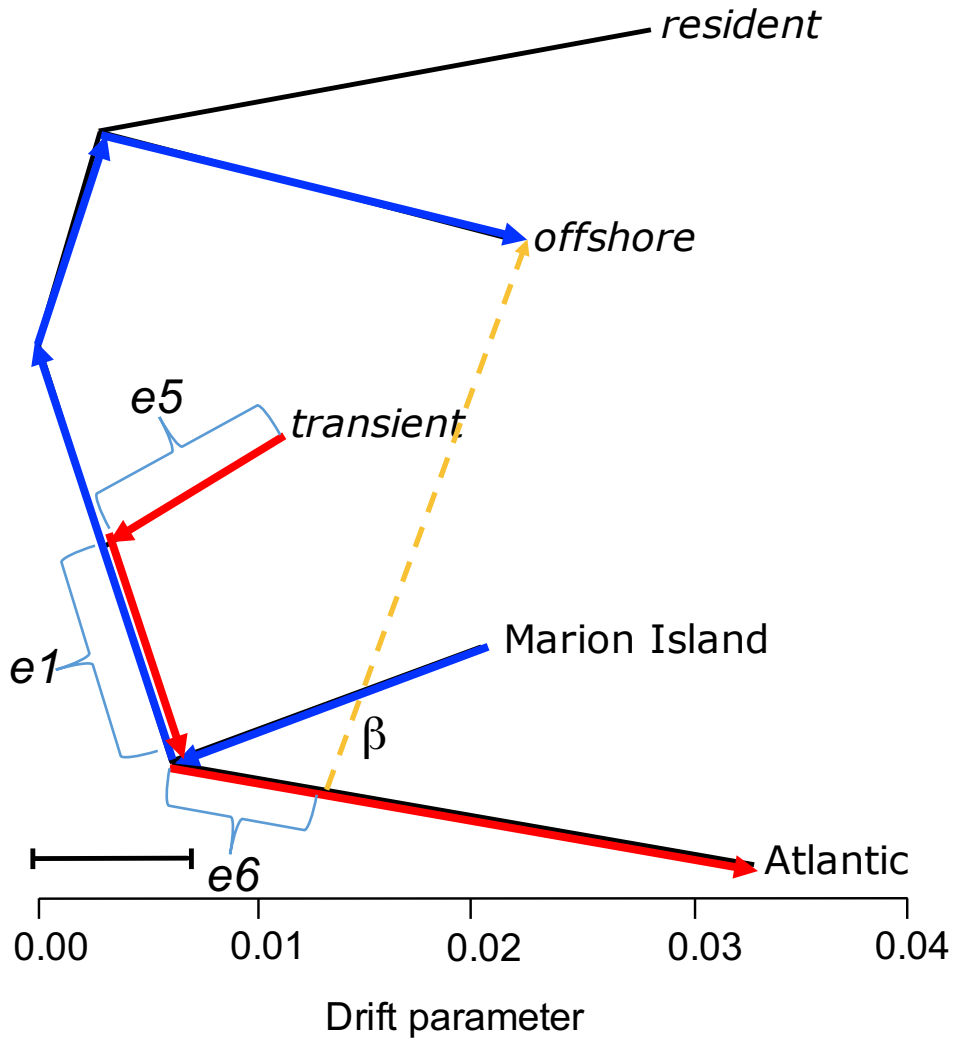

(c) Similarly, if we consider the red drift path from *transient* to Atlantic, we see that some of the overlapping drift that occurs along path *e1* in the opposing direction to the blue drift path from Marion Island to *offshore* will be cancelled out, as the drift from *transient* to Atlantic along edges *e1*, *e5* & *e6* will be shared via the migration edge with the *offshore* ecotype with probability  $\beta$ , where  $\beta$  depends upon the weight of migration. Thus,  $f_4(M,O; T,A) = e1 - (\alpha(e1+e2+e3+e4) + \beta(e1+e5+e6))$ .

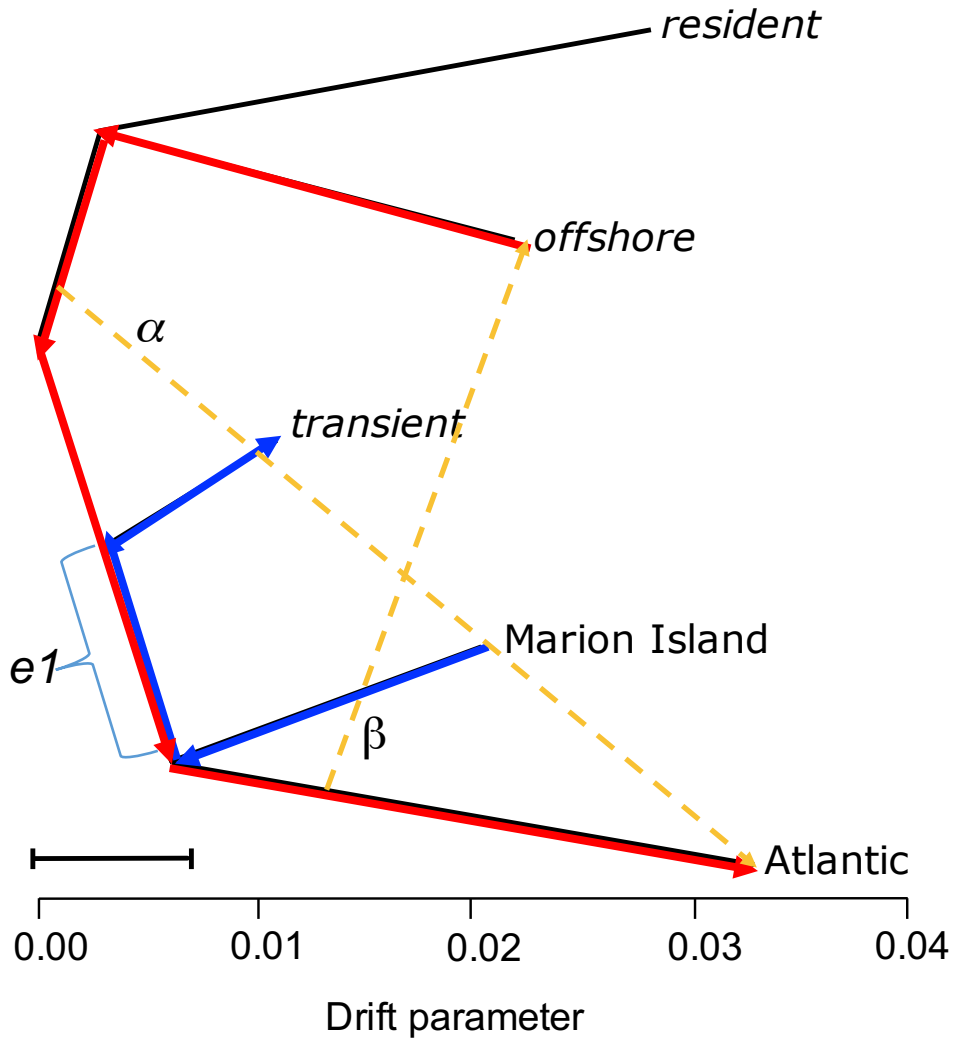

(d) In contrast to the example in (b & c), when we consider the  $f_4$  statistic test  $f_4(M,T; O,A)$ , we see that although the migration edges will reduce drift from *offshore* to Atlantic, there is no effect on the drift path from Marion Island to *transient*.

**Table S1.** Individual IDs of samples included in each run of SNAPP (see Figure 1 and Supplementary Figure 3). The total sample number for each ecotype/population from which these subsamples were selected are given in parentheses in the table header.

|             | <i>resident</i> (52)                        | <i>offshore</i> (7)             | <i>Transient</i> (37)                    | <b>Atlantic</b> (6)      | <b>Marion Island</b> (13)                          |
|-------------|---------------------------------------------|---------------------------------|------------------------------------------|--------------------------|----------------------------------------------------|
| subsample 1 | 1, 16, 104, 116, 31                         | 26, 96, 98, 100, 102            | 38, 48, 68, 79, 130                      | 82, 86, 87, 91, 92       | 131, 133, 136, 140, 145                            |
| subsample 2 | 6, 12, 22, 111, 123                         | 26, 96, 97, 99, 102             | 40, 42, 58, 62, 76                       | 82, 84, 87, 91, 92       | 137, 139, 141, 142, 143                            |
| subsample 3 | 9, 29, 109, 113, 129                        | 97, 98, 99, 100, 102            | 44, 55, 56, 70, 73                       | 82, 84, 86, 91, 92       | 132, 134, 135, 140, 145                            |
| subsample 4 | 11, 15, 24, 108, 120                        | 96, 97, 98, 99, 100             | 46, 53, 59, 64, 75                       | 82, 84, 86, 87, 92       | 132, 133, 136, 137, 143                            |
| subsample 5 | 6, 12, 22, 111, 123<br>9, 29, 109, 113, 129 | 26, 96, 97, 98, 99,<br>100, 102 | 40, 42, 58, 62, 76<br>44, 55, 56, 70, 73 | 82, 84, 86, 87<br>91, 92 | 132, 134, 135, 137, 139<br>140, 141, 142, 143, 145 |

**Table S2.** Estimates of theta and 95% highest posterior density interval (HPDI) for each branch and each run of SNAPP.

| Estimates of theta (95% HPDI) |                     |                     |                     |                     |                     |
|-------------------------------|---------------------|---------------------|---------------------|---------------------|---------------------|
|                               | subsample 1         | subsample 2         | subsample 3         | subsample 4         | subsample 5         |
| <b>resident</b>               | 0.051 (0.038-0.067) | 0.052 (0.038-0.068) | 0.062 (0.045-0.080) | 0.056 (0.045-0.077) | 0.040 (0.030-0.052) |
| <b>offshore</b>               | 0.058 (0.042-0.074) | 0.072 (0.056-0.094) | 0.081 (0.057-0.104) | 0.093 (0.072-0.119) | 0.055 (0.040-0.070) |
| <b>transient</b>              | 0.273 (0.219-0.327) | 0.267 (0.211-0.319) | 0.244 (0.193-0.299) | 0.269 (0.209-0.319) | 0.219 (0.178-0.263) |
| <b>Atlantic</b>               | 0.091 (0.072-0.106) | 0.084 (0.067-0.104) | 0.077 (0.060-0.093) | 0.096 (0.078-0.115) | 0.079 (0.064-0.094) |
| <b>Marion Island</b>          | 0.246 (0.198-0.298) | 0.257 (0.211-0.317) | 0.249 (0.199-0.302) | 0.221 (0.175-0.262) | 0.225 (0.189-0.263) |
| <b>Anc1</b>                   | 0.126 (0.066-0.189) | 0.132 (0.057-0.204) | 0.128 (0.069-0.190) | 0.127 (0.063-0.196) | 0.126 (0.065-0.196) |
| <b>Anc2</b>                   | 0.138 (0.074-0.217) | 0.142 (0.073-0.230) | 0.129 (0.060-0.199) | 0.128 (0.065-0.198) | 0.170 (0.084-0.279) |
| <b>Anc3</b>                   | 0.171 (0.110-0.237) | 0.147 (0.082-0.226) | 0.129 (0.073-0.199) | 0.147 (0.073-0.222) | 0.145 (0.085-0.215) |

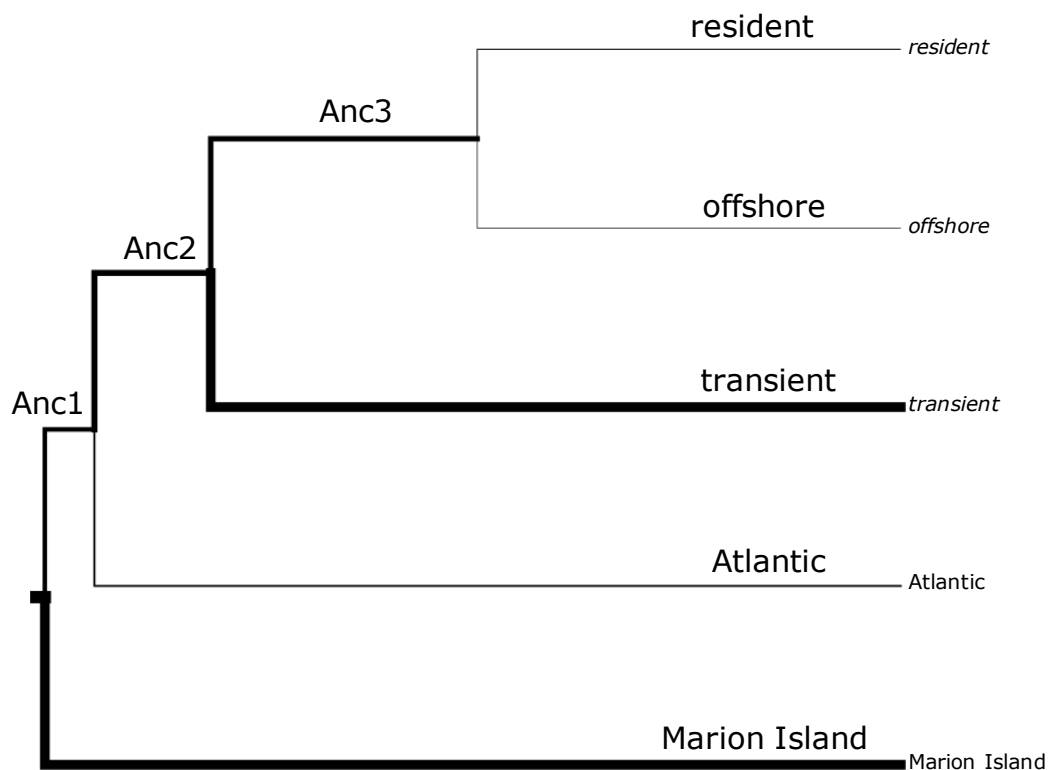

**Table S3.** Topologies from each run of SNAPP using different subsamples found within the 95% HPD of each using TreeSetAnalyser. The topology inferred from concatenated RAD-seq data in Moura *et al.* 2015 is highlighted in bold for each subsample.

**Subsample 1**

95% HPD contains 9 topologies, out of a total of 15 topologies

| #nr            | coverage   | tree                                |
|----------------|------------|-------------------------------------|
| Tree 1:        | 36%        | (((Res,Off),Trans),Atl),Mar)        |
| Tree 2:        | 18%        | (((Res,Off),Trans),(Atl,Mar))       |
| <b>Tree 3:</b> | <b>10%</b> | <b>(((Res,Off),Atl),Trans),Mar)</b> |
| Tree 4:        | 9%         | (((Res,Off),Trans),Mar),Atl)        |
| Tree 5:        | 6%         | (((Res,Off),(Trans,Atl)),Mar)       |
| Tree 6:        | 6%         | ((Res,Off),(Trans,(Atl,Mar)))       |
| Tree 7:        | 5%         | ((Res,Off),((Trans,Mar),Atl))       |
| Tree 8:        | 4%         | ((Res,Off),((Trans,Atl),Mar))       |
| Tree 9:        | 2%         | (((Res,Off),Atl),(Trans,Mar))       |

**Subsample 2**

95% HPD contains 9 topologies, out of a total of 16 topologies

| #nr            | coverage  | tree                                |
|----------------|-----------|-------------------------------------|
| Tree 1:        | 36%       | (((Res,Off),Trans),Atl),Mar)        |
| Tree 2:        | 23%       | (((Res,Off),Trans),(Atl,Mar))       |
| <b>Tree 3:</b> | <b>9%</b> | <b>(((Res,Off),Atl),Trans),Mar)</b> |
| Tree 4:        | 9%        | (((Res,Off),Trans),Mar),Atl)        |
| Tree 5:        | 6%        | (((Res,Off),(Trans,Atl)),Mar)       |
| Tree 6:        | 5%        | ((Res,Off),(Trans,(Atl,Mar)))       |
| Tree 7:        | 4%        | ((Res,Off),((Trans,Mar),Atl))       |
| Tree 8:        | 3%        | (((Res,Off),Atl),(Trans,Mar))       |
| Tree 9:        | 2%        | ((Res,Off),((Trans,Atl),Mar))       |

**Subsample 3**

95% HPD contains 7 topologies, out of a total of 13 topologies

| #nr            | coverage   | tree                                |
|----------------|------------|-------------------------------------|
| Tree 1:        | 43%        | (((Res,Off),Trans),Atl),Mar)        |
| Tree 2:        | 22%        | (((Res,Off),Trans),(Atl,Mar))       |
| <b>Tree 3:</b> | <b>11%</b> | <b>(((Res,Off),Atl),Trans),Mar)</b> |
| Tree 4:        | 10%        | (((Res,Off),(Trans,Atl)),Mar)       |
| Tree 5:        | 4%         | ((Res,Off),(Trans,(Atl,Mar)))       |
| Tree 6:        | 3%         | (((Res,Off),Trans),Mar),Atl)        |
| Tree 7:        | 2%         | ((Res,Off),((Trans,Atl),Mar))       |

#### Subsample 4

95% HPD contains 7 topologies, out of a total of 14 topologies

| #nr            | coverage  | tree                                |
|----------------|-----------|-------------------------------------|
| Tree 1:        | 25%       | (((Res,Off),Trans),Atl),Mar)        |
| Tree 2:        | 21%       | (((Res,Off),Trans),(Atl,Mar))       |
| Tree 3:        | 10%       | ((Res,Off),((Trans,Mar),Atl))       |
| Tree 4:        | 9%        | (((Res,Off),Trans),Mar),Atl         |
| Tree 5:        | 7%        | ((Res,Off),(Trans,(Atl,Mar)))       |
| Tree 6:        | 7%        | (((Res,Off),Atl),(Trans,Mar))       |
| <b>Tree 7:</b> | <b>6%</b> | <b>(((Res,Off),Atl),Trans),Mar)</b> |
| Tree 8:        | 4%        | (((Res,Off),(Trans,Mar)),Atl)       |
| Tree 9:        | 4%        | (((Res,Off),(Trans,Atl)),Mar)       |
| Tree 10:       | 4%        | ((Res,Off),((Trans,Atl),Mar))       |

#### Subsample 4

95% HPD contains 6 topologies, out of a total of 8 topologies

| #nr     | coverage | tree                          |
|---------|----------|-------------------------------|
| Tree 1: | 31%      | ((Res,Off),((Trans,Mar),Atl)) |
| Tree 2: | 24%      | ((Res,Off),(Trans,(Atl,Mar))) |
| Tree 3: | 19%      | (Res,(Off,((Trans,Mar),Atl))) |
| Tree 4: | 10%      | ((Res,Off),((Trans,Atl),Mar)) |
| Tree 5: | 7%       | (Res,(Off,(Trans,(Atl,Mar)))) |
| Tree 6: | 6%       | (Res,(Off,((Trans,Atl),Mar))) |

#### Subsample 5

95% HPD contains 3 topologies, out of a total of 10 topologies

| #nr     | coverage | tree                          |
|---------|----------|-------------------------------|
| Tree 1: | 61%      | (((Res,Off),Trans),Atl),Mar)  |
| Tree 2: | 23%      | (((Res,Off),Trans),(Atl,Mar)) |
| Tree 3: | 13%      | (((Res,Off),Trans),Mar),Atl   |



**Table S4.**  $f_4$  statistic results for comparisons of different topologies. Runs were done using different jackknife block sizes to estimate standard error (s.e.).

| <i>Four-taxon tree</i>                                      | <i><math>f_4</math> statistic</i> | <i>s.e.</i> | <i>Z-score</i> |
|-------------------------------------------------------------|-----------------------------------|-------------|----------------|
| <b>Estimating <math>f_4</math> in 461 blocks of size 5</b>  |                                   |             |                |
| Res,MI;Trans,Off                                            | -0.0061                           | 0.0016      | -3.752         |
| Res,Off;Trans,MI                                            | 0.0009                            | 0.0011      | 0.840          |
| Res,Trans;Off,MI                                            | 0.0070                            | 0.0016      | 4.392          |
| Res,Atl;Trans,Off                                           | -0.0049                           | 0.0018      | -2.751         |
| Res,Off;Trans,Atl                                           | 0.0015                            | 0.0014      | 1.056          |
| Res,Trans;Off,Atl                                           | 0.0064                            | 0.0018      | 3.590          |
| Res,Atl;Trans,MI                                            | 0.0040                            | 0.0014      | 2.785          |
| Res,MI;Trans,Atl                                            | 0.0034                            | 0.0017      | 2.028          |
| Res,Trans;MI,Atl                                            | -0.0006                           | 0.0015      | -0.414         |
| Res,Atl;Off,MI                                              | 0.0089                            | 0.0022      | 3.992          |
| Res,MI;Off,Atl                                              | 0.0095                            | 0.0022      | 4.255          |
| Res,Off;MI,Atl                                              | 0.0006                            | 0.0015      | 0.377          |
| Trans,Atl;Off,MI                                            | 0.0019                            | 0.0016      | 1.216          |
| Trans,MI;Off,Atl                                            | 0.0031                            | 0.0014      | 2.227          |
| Trans,Off;MI,Atl                                            | 0.0012                            | 0.0014      | 0.851          |
| <b>Estimating <math>f_4</math> in 230 blocks of size 10</b> |                                   |             |                |
| Res,MI;Trans,Off                                            | -0.0061                           | 0.0016      | -3.760         |
| Res,Off;Trans,MI                                            | 0.0009                            | 0.0010      | 0.902          |
| Res,Trans;Off,MI                                            | 0.0070                            | 0.0016      | 4.571          |
| Res,Atl;Trans,Off                                           | -0.0049                           | 0.0018      | -2.791         |
| Res,Off;Trans,Atl                                           | 0.0015                            | 0.0015      | 1.027          |
| Res,Trans;Off,Atl                                           | 0.0064                            | 0.0019      | 3.347          |
| Res,Atl;Trans,MI                                            | 0.0040                            | 0.0014      | 2.795          |
| Res,MI;Trans,Atl                                            | 0.0034                            | 0.0017      | 1.976          |
| Res,Trans;MI,Atl                                            | -0.0006                           | 0.0015      | -0.412         |
| Res,Atl;Off,MI                                              | 0.0089                            | 0.0022      | 4.124          |
| Res,MI;Off,Atl                                              | 0.0095                            | 0.0023      | 4.104          |
| Res,Off;MI,Atl                                              | 0.0006                            | 0.0015      | 0.386          |
| Trans,Atl;Off,MI                                            | 0.0019                            | 0.0016      | 1.189          |
| Trans,MI;Off,Atl                                            | 0.0030                            | 0.0013      | 2.332          |
| Trans,Off;MI,Atl                                            | 0.0012                            | 0.0014      | 0.861          |
| <b>Estimating <math>f_4</math> in 46 blocks of size 50</b>  |                                   |             |                |
| Res,MI;Trans,Off                                            | -0.0061                           | 0.0017      | -3.599         |
| Res,Off;Trans,MI                                            | 0.0009                            | 0.0010      | 0.874          |
| Res,Trans;Off,MI                                            | 0.0070                            | 0.0015      | 4.774          |
| Res,Atl;Trans,Off                                           | -0.0049                           | 0.0020      | -2.495         |
| Res,Off;Trans,Atl                                           | 0.0015                            | 0.0015      | 1.010          |
| Res,Trans;Off,Atl                                           | 0.0064                            | 0.0020      | 3.191          |
| Res,Atl;Trans,MI                                            | 0.0040                            | 0.0015      | 2.601          |
| Res,MI;Trans,Atl                                            | 0.0034                            | 0.0019      | 1.759          |
| Res,Trans;MI,Atl                                            | -0.0006                           | 0.0014      | -0.427         |
| Res,Atl;Off,MI                                              | 0.0089                            | 0.0025      | 3.505          |
| Res,MI;Off,Atl                                              | 0.0095                            | 0.0025      | 3.754          |
| Res,Off;MI,Atl                                              | 0.0006                            | 0.0015      | 0.3817         |
| Trans,Atl;Off,MI                                            | 0.0019                            | 0.0018      | 1.056          |
| Trans,MI;Off,Atl                                            | 0.0031                            | 0.0012      | 2.467          |
| Trans,Off;MI,Atl                                            | 0.0012                            | 0.0014      | 0.840          |
